# Supplementary material for: The Association of Body Mass Index With Mortality Among Pulmonary Hypertension Patients: A Systematic Review and Meta-Analysis of Cohort Studies
Source: PubMed Central journal article supplement (PMC9127599; doi:10.3389/fpubh.2022.761904), 2022-05-10
Supplement: Data_Sheet_1.pdf [file Data_Sheet_1.pdf]

### Supplementary Figure 1

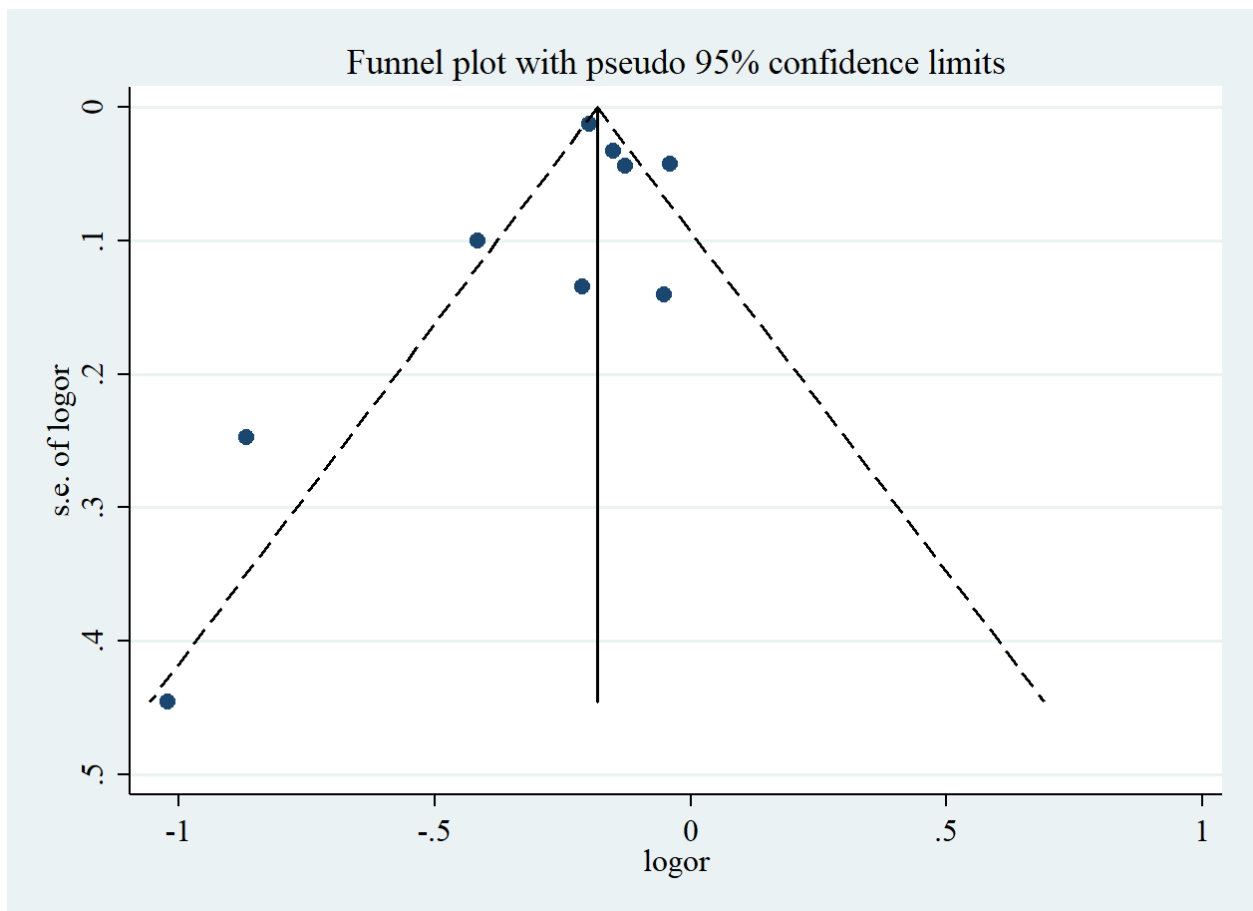

Funnel plot of the risk estimates of nine studies on the association between 5-unit increment in body mass index and risk of mortality among pulmonary hypertension patients. Each dot represents one study.

## Supplementary Figure 2

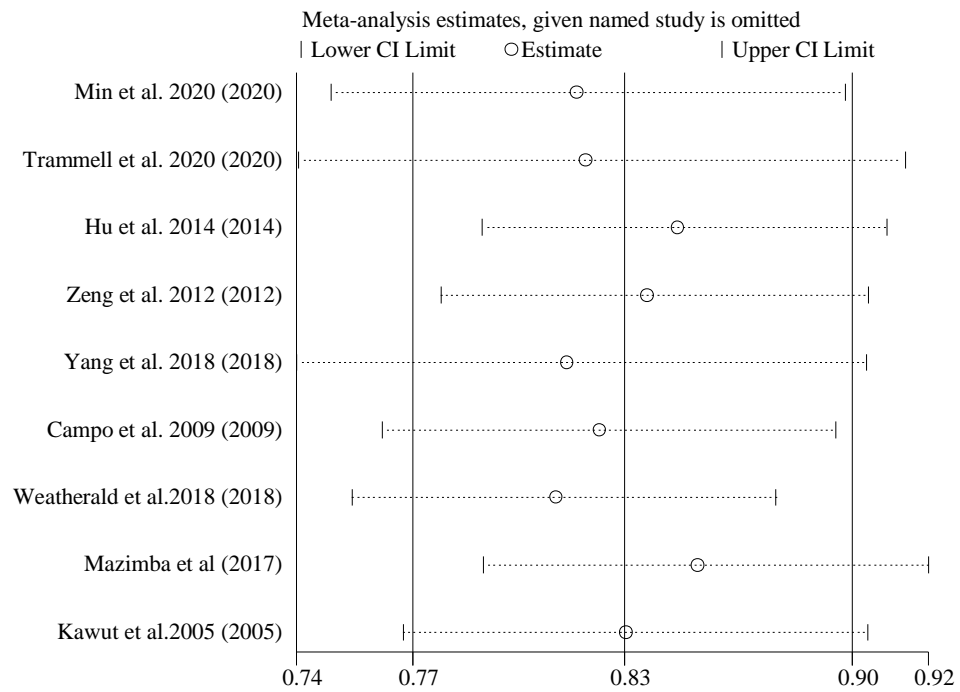

Sensitivity analysis of the association between 5-unit increment in body mass index and risk of mortality among pulmonary hypertension patients. CI, confidence interval
